# Supplementary material for: Gold nanoparticles for designing of smart colorimetric logic gates operations and scavengers for mercury ions in water
Source: Royal Society of Chemistry journal article supplement (doi:10.1039/c4ay00914b), 2014-01-01
Supplement: c4ay00914b1.pdf [file c4ay00914b1.pdf]

## Supplementary Information (ESI)

Manuscript ID AY-ART-03-2014-000542

### Gold nanoparticles for design of smart colorimetric logic gates operations and scavengers for mercury ions in water

Anshu Kumar , Parimal Paul

| S. No. | Title                                                                                                                                                                                                                                                                                                                                            | Page No. |
|--------|--------------------------------------------------------------------------------------------------------------------------------------------------------------------------------------------------------------------------------------------------------------------------------------------------------------------------------------------------|----------|
| 1      | <b>Fig. S1</b> (A) the absorbance ratio $A_{649}/A_{520}$ of DM-AuNPs with $H_2PO_4^-$ (20 $\mu M$ ) with different concentrations of AuNPs at pH 7.0. (B) The absorbance ratio $A_{649}/A_{520}$ of DM-AuNPs (1.9 nM) $H_2PO_4^-$ (20 $\mu M$ ) at different pH.                                                                                | S3       |
| 2      | <b>Fig. S2</b> Plot of the absorbance ratio $A_{649}/A_{520}$ for DM-AuNPs (1.9 nM) with increasing concentration of $H_2PO_4^-$ .                                                                                                                                                                                                               | S4       |
| 3      | <b>Fig. S3</b> UV-vis spectral changes for the citrate stabilized AuNPs with incremental addition of DM (0, 0.06, 0.08, 0.1, 0.2, 0.4, 0.6, 0.8, 1, 2, 4, 6, 9, 10, 11, 12 and 20 $\mu M$ ) in the presence of 20 $\mu M$ $H_2PO_4^-$ . Inset: plot of $A_{649}/A_{520}$ vs concentration of DM, only linear portion ( $R^2 = 0.991$ ) is shown. | S5       |
| 4      | <b>Fig. S4(a)</b> Plot of absorption ratios $A_{649}/A_{520}$ corresponding to the concentration of DM in the range 0.06-20 $\mu M$ in presence of 20 $\mu M$ $H_2PO_4^-$ and <b>(b)</b> Photographic image of AuNPs with incremental addition of DM in the concentration range 0.06 - 20 $\mu M$ .                                              | S6       |
| 5      | <b>Fig. S5</b> The plot of the ratio of $A_{649}/A_{520}$ vs time from the UV-vis spectral change obtained from the solution containing 1.9 nM AuNPs and (a) 20 $\mu M$ $H_2PO_4^-$ +10 $\mu M$ DM , (b) 10 $\mu M$ DM and (c) 40 $\mu M$ $H_2PO_4^-$ and its respective TEM images.                                                             | S7       |
| 6      | <b>Fig. S6</b> A nonimplication logic gate system consisting AuNPs by using 20 $\mu M$ $H_2PO_4^-$ (1) and 4 $\mu M$ DM (2) analytes as inputs. (a) Illustration of the operational design of the AND gate. (b) Truth table of the AND gate. (c) Equivalent electronic circuit for the nonimplication logic operation.                           | S8       |
| 7      | <b>Fig. S7</b> Results of nonimplication logic gate with different input                                                                                                                                                                                                                                                                         | S9       |

|           |                                                                                                                                                                                              |            |
|-----------|----------------------------------------------------------------------------------------------------------------------------------------------------------------------------------------------|------------|
|           | modes were characterized by colorimetric and UV–vis detection (a), the corresponding logic readout in the form of $A_{649}/A_{520}$ (b), TEM images (c) and photographic image (d).          |            |
| <b>8</b>  | <b>Fig. S8</b> Absorption spectra of DM, $H_2PO_4^-$ and both in the absence and presence of $Hg^{2+}$ .                                                                                     | <b>S10</b> |
| <b>9</b>  | <b>Fig. S9</b> ESI MS spectrum of the $[DM-Hg^{2+}]$ complex.                                                                                                                                | <b>S11</b> |
| <b>10</b> | <b>Fig. S10</b> TEM images of the AuNPs-Hg system. (A, B, and C) of different regions (1.9 nm AuNPs) after treated with 4 $\mu M$ $Hg^{2+}$ and its EDX data.                                | <b>S12</b> |
| <b>11</b> | <b>Fig. S11</b> The UV-vis spectra of the cit-AuNPs (red), after treatment with DM and $H_2PO_4^-$ (aggregated-AuNPs), purple), and aggregated-AuNPs treated with $Hg^{2+}$ (reddish brown). | <b>S13</b> |
| <b>12</b> | <b>Fig. S12</b> A Plot of absorption ratios $A_{649}/A_{520}$ of aggregated-AuNPs corresponding to the concentration of $Hg^{2+}$ in the range 0.002-20 $\mu M$ .                            | <b>S14</b> |
| <b>13</b> | <b>Fig. S13</b> A Plot of absorption ratios $A_{649}/A_{520}$ of aggregated-AuNPs corresponding to the concentration of $Hg^{2+}$ in the range 0.002-0.8 $\mu M$ .                           | <b>S15</b> |
| <b>14</b> | <b>Fig. S14</b> Removal of $Hg^{2+}$ from the lake water. Microscope image of the precipitate taken at 40X magnification and zoom.                                                           | <b>S16</b> |

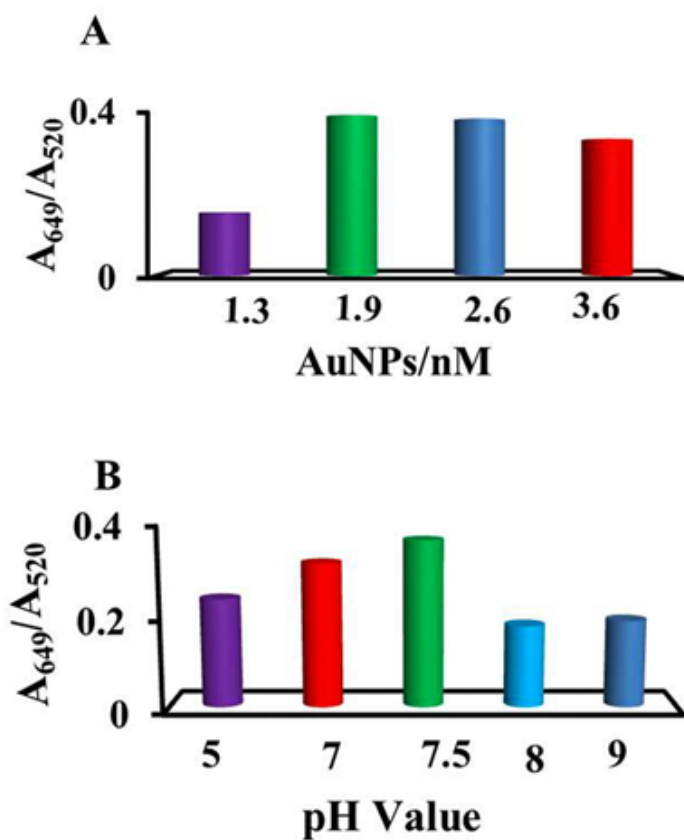

**Fig. S1** (A) the absorbance ratio  $A_{649}/A_{520}$  of DM-AuNPs with  $H_2PO_4^-$  (20  $\mu M$ ) with different concentrations of AuNPs at pH 7.0. (B) The absorbance ratio  $A_{649}/A_{520}$  of DM-AuNPs (1.9 nM)  $H_2PO_4^-$  (20  $\mu M$ ) at different pH.

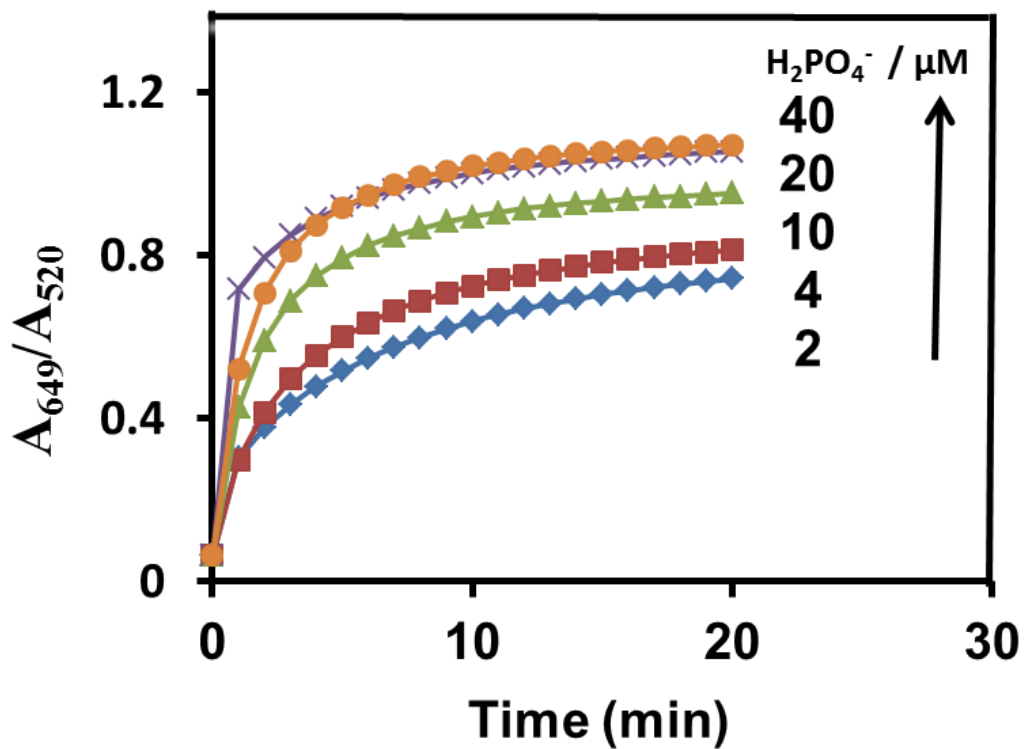

**Fig. S2** Plot of the absorbance ratio  $A_{649}/A_{520}$  for DM-AuNPs (1.9 nM) with increasing concentration of  $H_2PO_4^-$

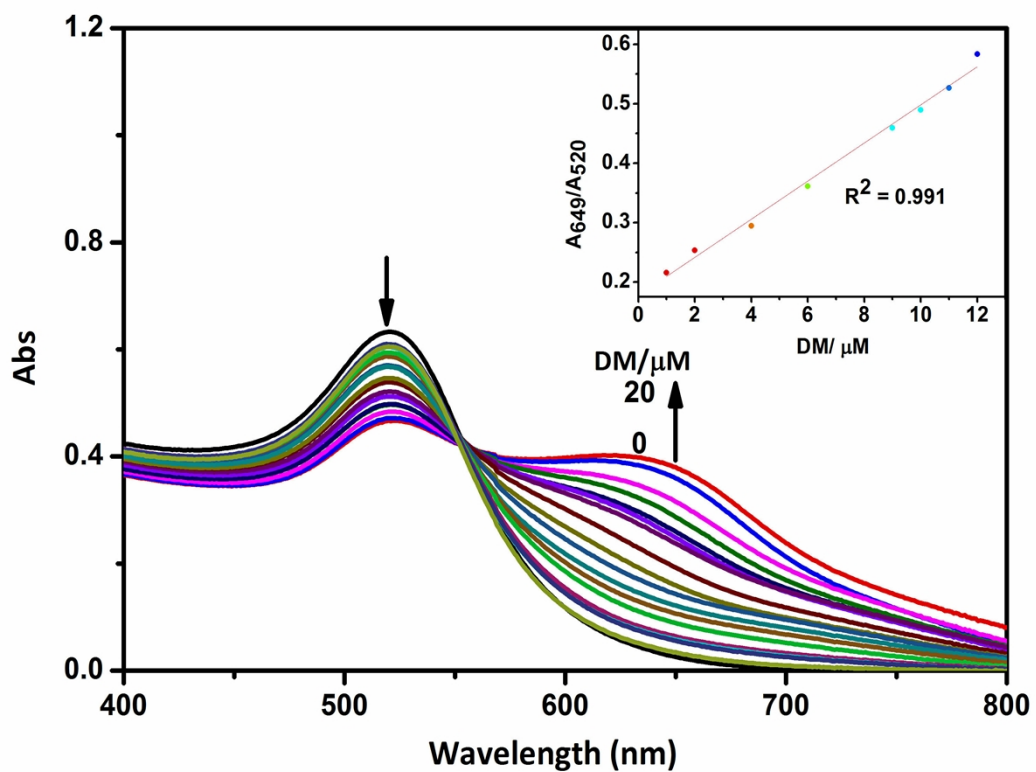

**Fig. S3** UV-vis spectral changes for the citrate stabilized AuNPs with incremental addition of DM (0, 0.06, 0.08, 0.1, 0.2, 0.4, 0.6, 0.8, 1, 2, 4, 6, 9, 10, 11, 12 and 20  $\mu\text{M}$ ) in the presence of 20  $\mu\text{M}$   $\text{H}_2\text{PO}_4^-$ . Inset: plot of  $A_{649}/A_{520}$  vs concentration of DM, only linear portion ( $R^2 = 0.991$ ) is shown.

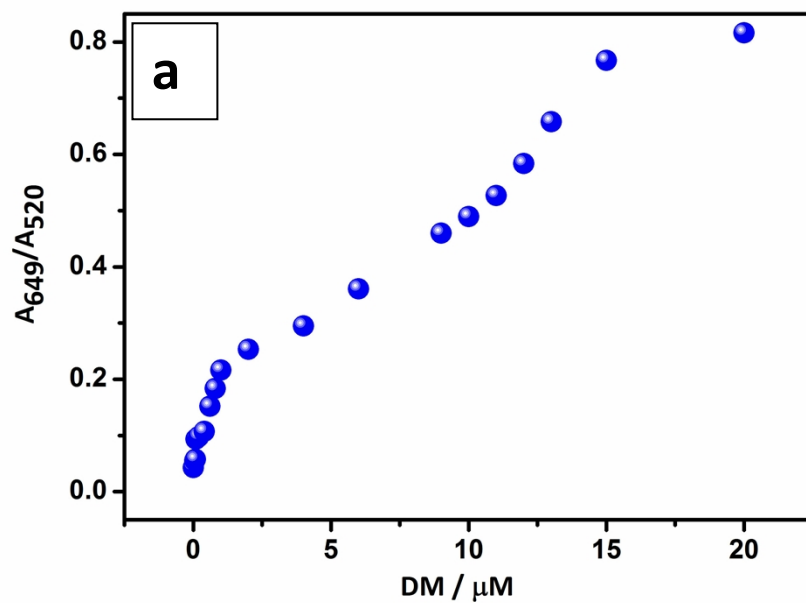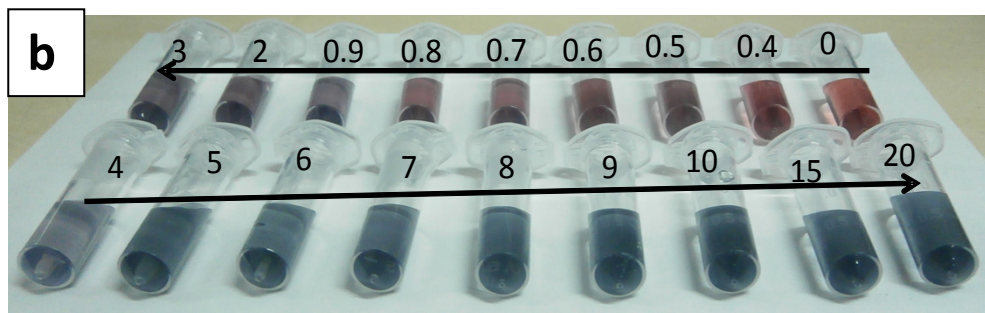

**Fig. S4(a)** Plot of absorption ratios  $A_{649}/A_{520}$  corresponding to the concentration of DM in the range 0.06-20  $\mu\text{M}$  in presence of 20  $\mu\text{M}$   $\text{H}_2\text{PO}_4^-$  and **(b)** Photographic image of AuNPs with incremental addition of DM in the concentration range 0.06 - 20  $\mu\text{M}$ .

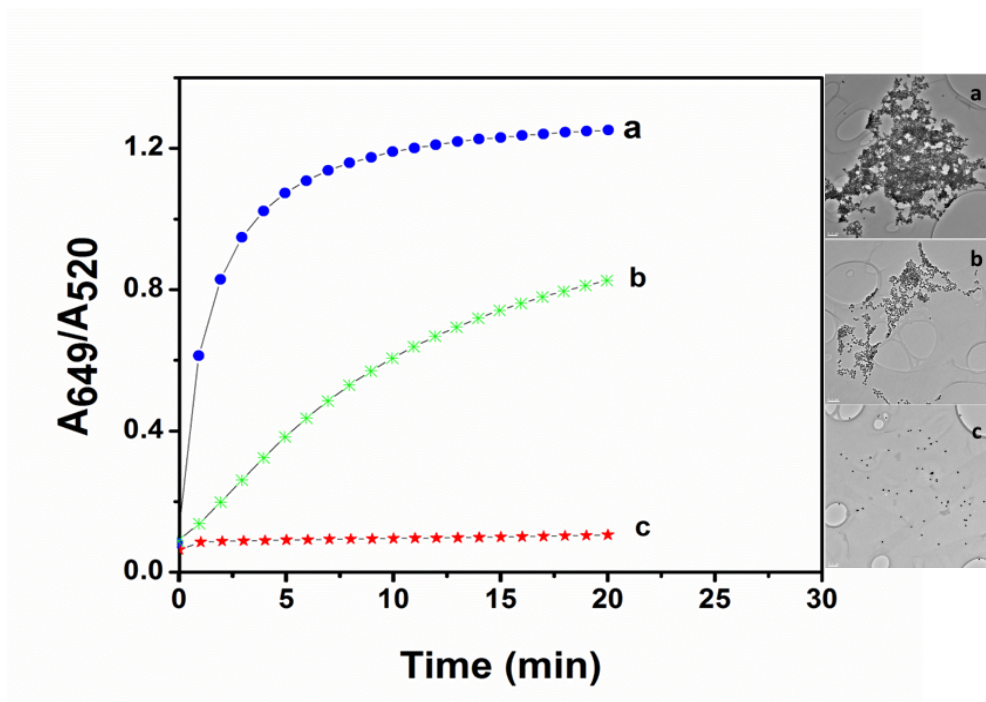

**Fig. S5** The plot of the ratio of  $A_{649}/A_{520}$  vs time from the UV-vis spectral change obtained from the solution containing 1.9 nM AuNPs and (a) 20  $\mu\text{M}$   $\text{H}_2\text{PO}_4^-$ +10  $\mu\text{M}$  DM , (b) 10  $\mu\text{M}$  DM and (c) 40  $\mu\text{M}$   $\text{H}_2\text{PO}_4^-$  and its respective TEM images.

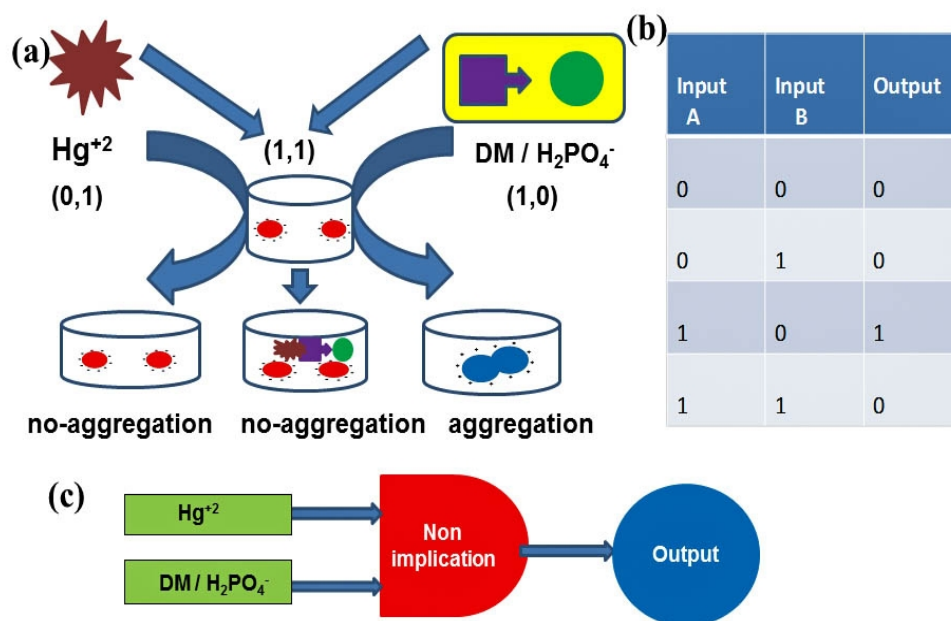

**Fig. S6** A nonimplication logic gate system consisting AuNPs by using 20  $\mu\text{M}$   $\text{H}_2\text{PO}_4^-$  (1) and 4  $\mu\text{M}$  DM (2) analytes as inputs. (a) Illustration of the operational design of the AND gate. (b) Truth table of the AND gate. (c) Equivalent electronic circuit for the nonimplication logic operation.



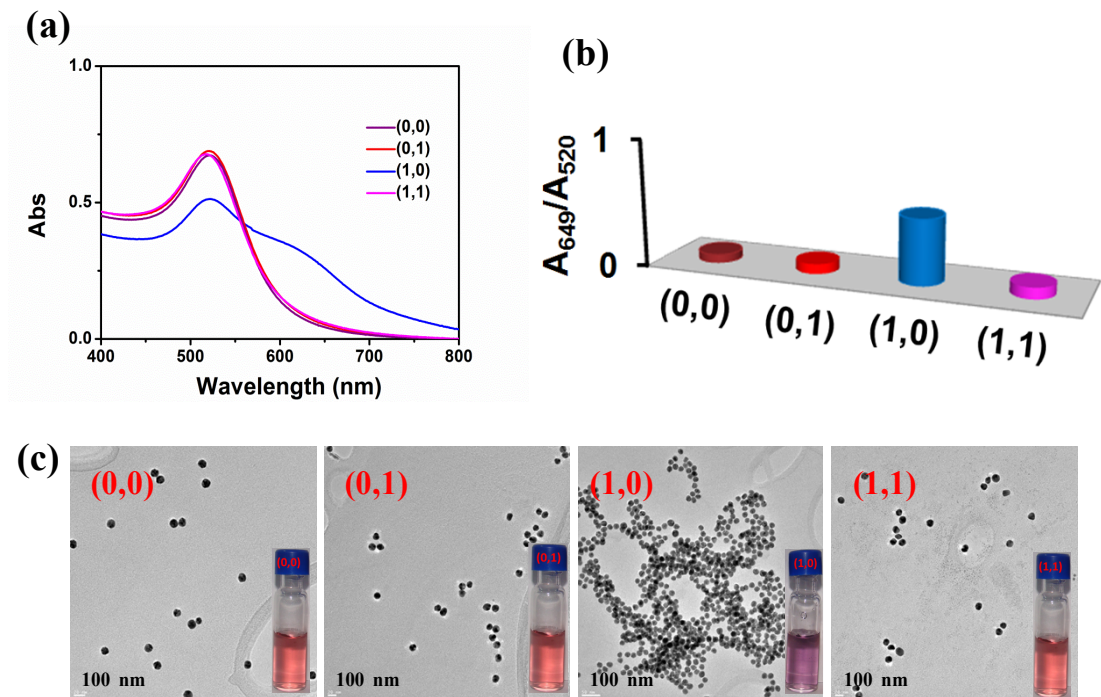

**Fig. S7** Results of nonimplication logic gate with different input modes were characterized by colorimetric and UV-vis detection (a), the corresponding logic readout in the form of  $A_{649}/A_{520}$  (b), TEM images (c) and photographic image (d).

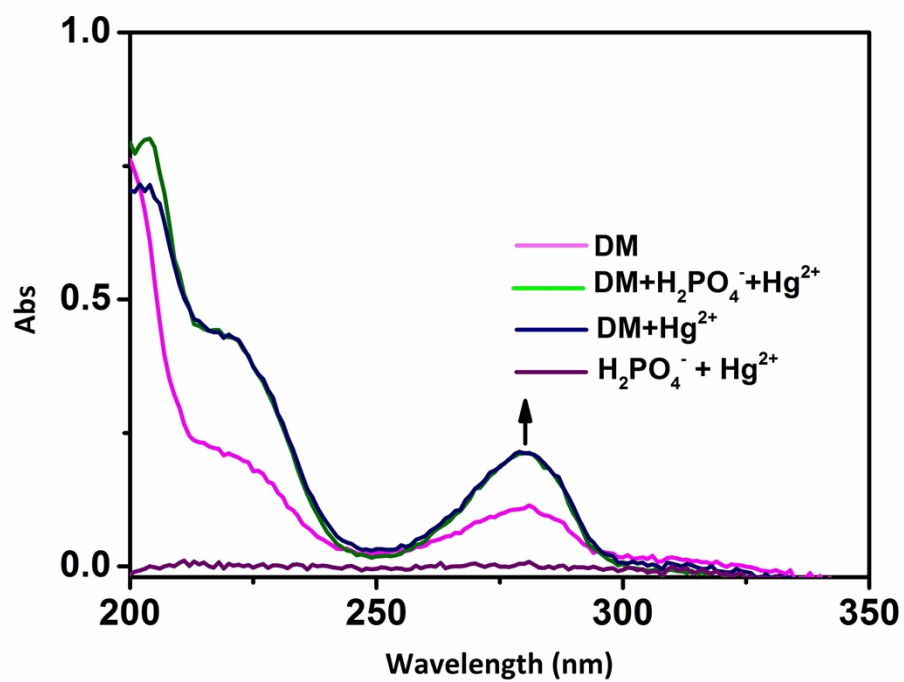

Fig. S8 Absorption spectra of DM, H<sub>2</sub>PO<sub>4</sub><sup>-</sup> and both in the absence and presence of Hg<sup>2+</sup>

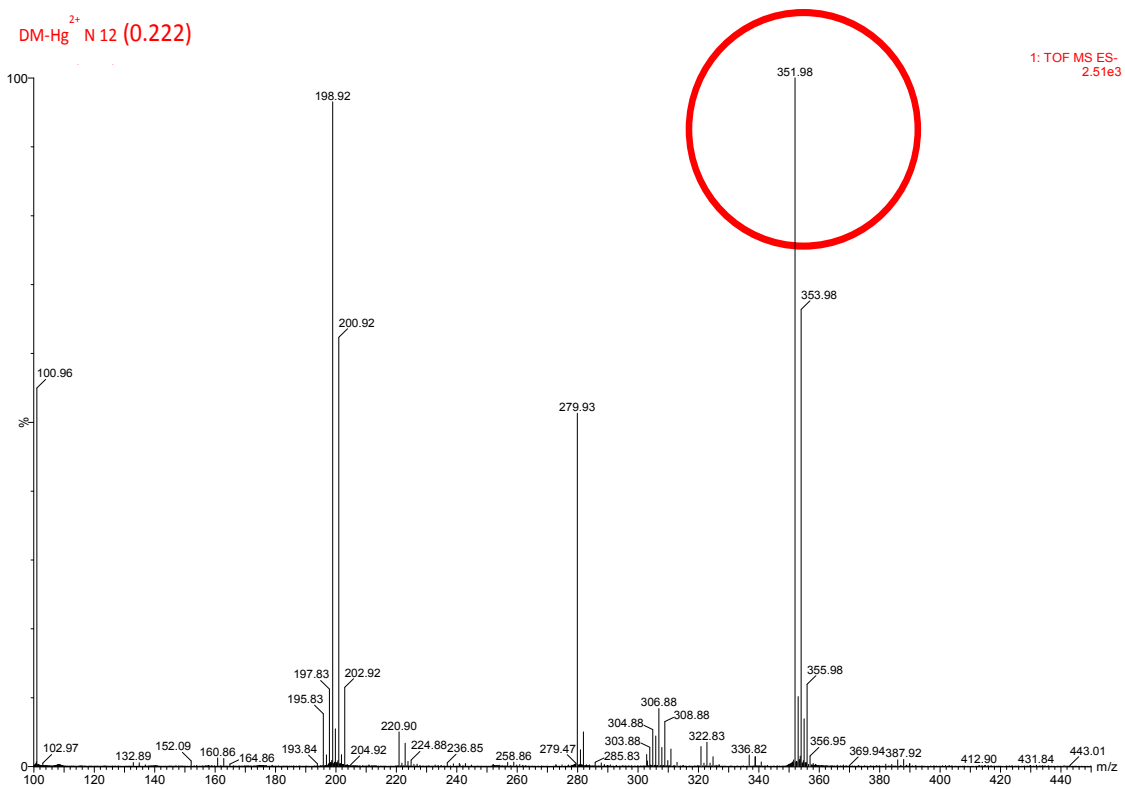

Fig. S9 ESI MS spectrum of the [DM-Hg<sup>2+</sup>] complex.

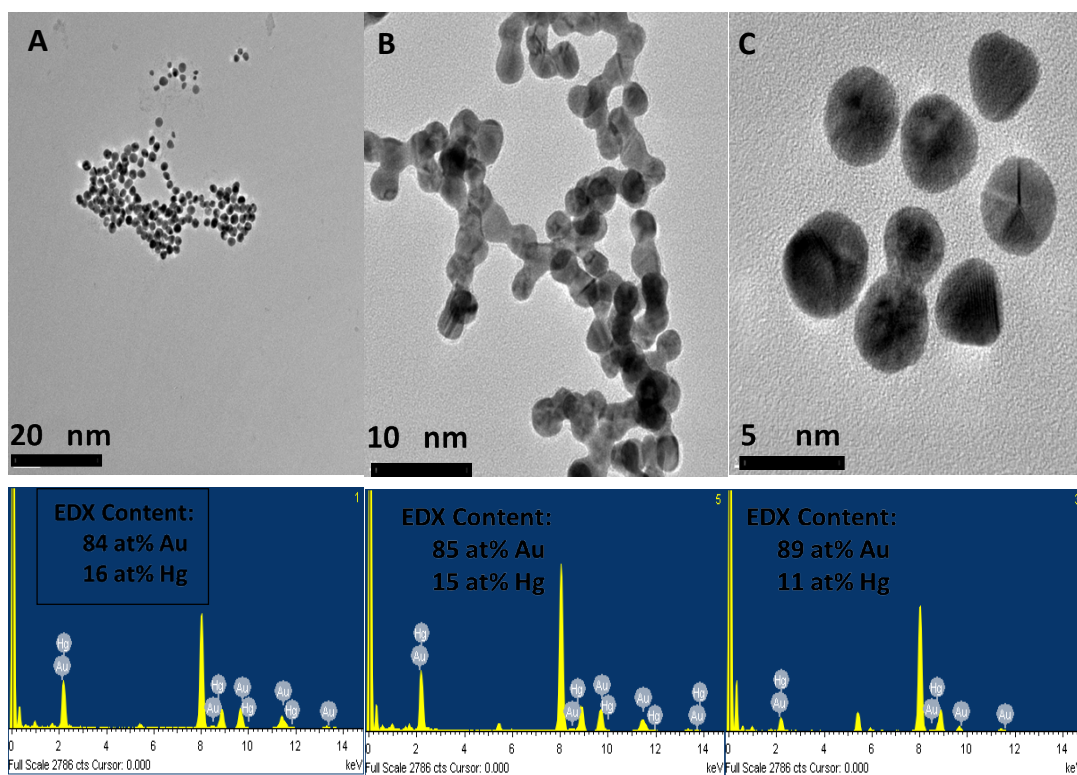

**Fig. S10** TEM images of the AuNPs-Hg system. (A, B and C) of different regions (1.9 nM AuNPs) after treated with 4  $\mu\text{M}$   $\text{Hg}^{2+}$  and its EDX data.

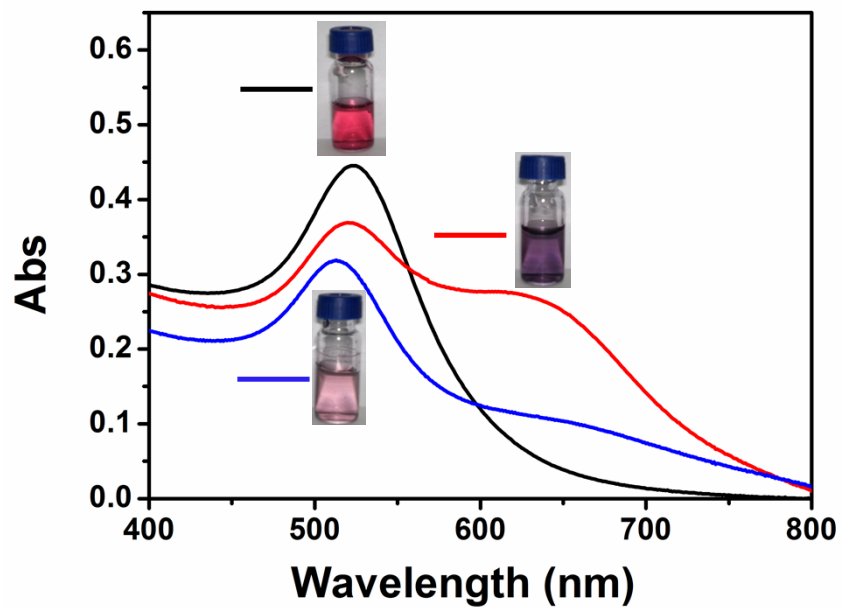

**Fig. S11** The UV-vis spectra of the cit-AuNPs (red), after treatment with DM and  $\text{H}_2\text{PO}_4^-$  (aggregated-AuNPs), purple), and aggregated-AuNPs treated with  $\text{Hg}^{2+}$  (reddish brown).

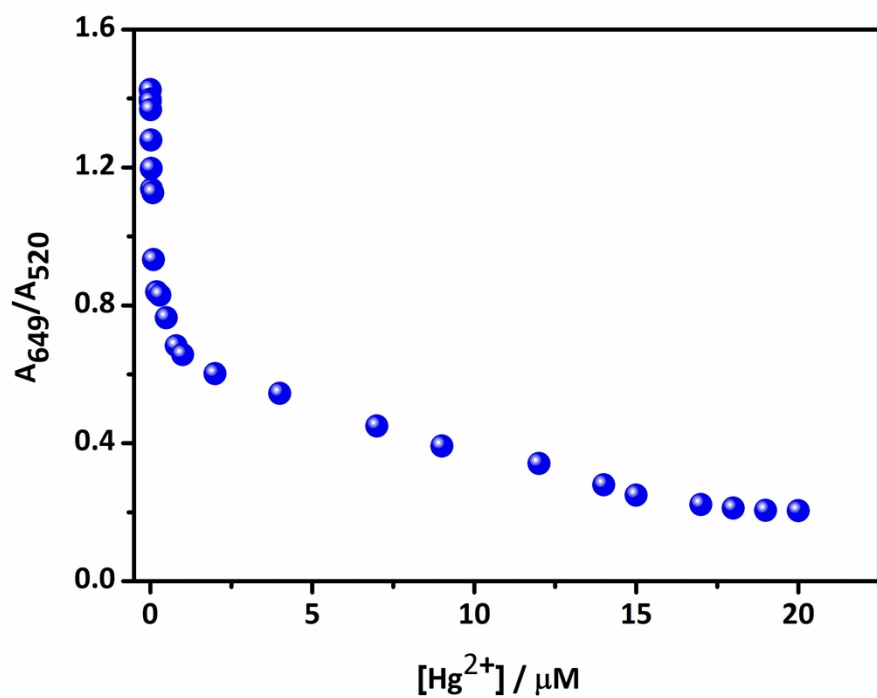

**Fig. S12** A Plot of absorption ratios  $A_{649}/A_{520}$  of aggregated-AuNPs corresponding to the concentration of  $\text{Hg}^{2+}$  in the range 0.002-20  $\mu\text{M}$ .

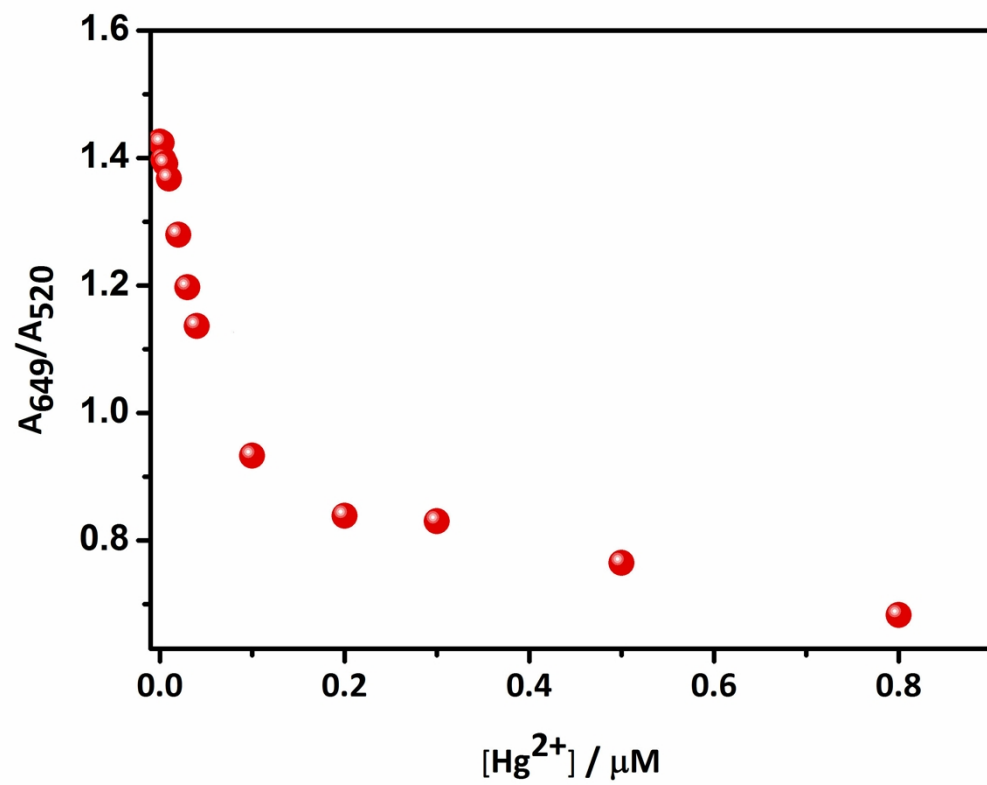

**Fig. S13** A Plot of absorption ratios  $A_{649}/A_{520}$  of aggregated-AuNPs corresponding to the concentration of  $\text{Hg}^{2+}$  in the range 0.002-0.8  $\mu\text{M}$ .

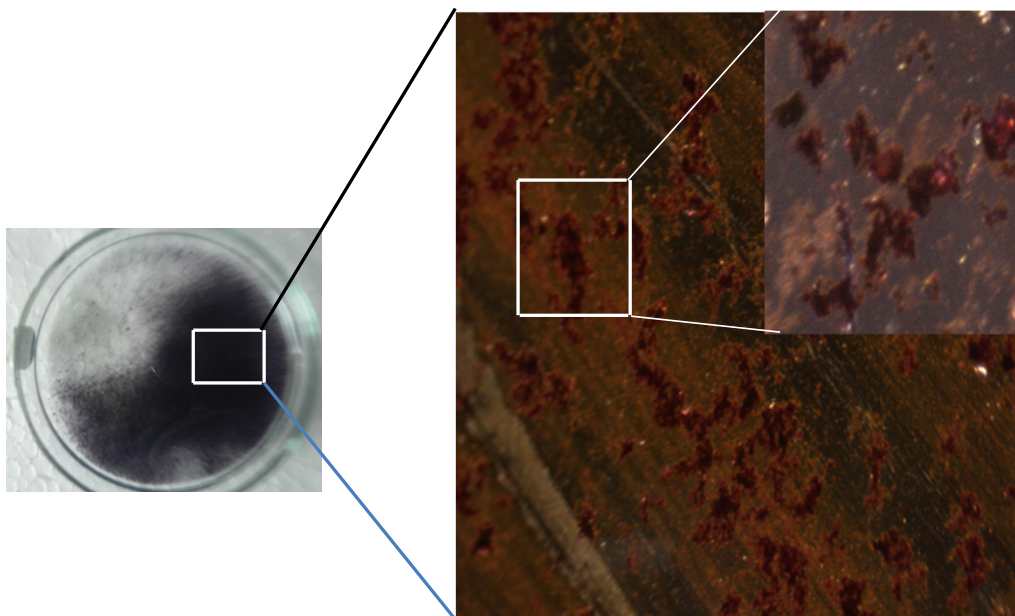

**Fig. S14** Removal of  $\text{Hg}^{2+}$  from the lake water. Microscope image of the precipitate taken at 40X magnification and zoom
